# Supplementary material for: Guard cells control hypocotyl elongation through HXK1, HY5, and PIF4
Source: PubMed Central journal article supplement (PMC8217561; doi:10.1038/s42003-021-02283-y), 2021-06-21
Supplement: 42003_2021_2283_MOESM1_ESM.pdf [file 42003_2021_2283_MOESM1_ESM.pdf]

# **Guard cells control hypocotyl elongation through HXK, HY5 and PIF4**

Gilor Kelly<sup>1</sup>, Danja Brandsma<sup>1</sup>, Aiman Egbaria<sup>1,2</sup>, Ofer Stein<sup>1</sup>, Adi Doron-Faigenboim<sup>1</sup>, Nitsan Lugassi<sup>1</sup>, Eduard Belausov<sup>1</sup>, Hanita Zemach<sup>1</sup>, Felix Shaya<sup>1</sup>, Nir Carmi<sup>1</sup>, Nir Sade<sup>2</sup> and David Granot<sup>1\*</sup>

*<sup>1</sup>Institute of Plant Sciences, Agricultural Research Organization, The Volcani Center, Rishon LeZion 7505101, Israel*

*<sup>2</sup>School of Plant Science and Food Security, Tel Aviv University, Tel Aviv, Israel*

**\*Corresponding author:** David Granot, granot@agri.gov.il

This file includes:

Supplementary Tables 1-6

Supplementary Figures 1-6

## **Supplementary Material**

**Supplementary Table 1** qPCR primers used in this study.

**Supplementary Table 2** Primers used for mutant genotyping.

**Supplementary Table 3** Primers used for cloning and the identification of transgenic plants.

**Supplementary Table 4** Accession numbers and probe ID numbers of *AtHY5* and *AtHYH* used in the microarray database analysis.

**Supplementary Table 5** Optimized LC-MS-MS parameters for quantification of plant hormones.

**Supplementary Table 6** Solvent gradient program for auxins

**Supplementary Figure 1** Genes differentially expressed in GCHXK transgenic seedlings relative to the WT

**Supplementary Figure 2** Pathways changed by GCHXK

**Supplementary Figure 3** Gene ontology (GO) analysis of differentially expressed, down-regulated (a) biological processes, (b) cellular components and (c) molecular functions in GCHXK, relative to the WT

**Supplementary Figure 4** Gene ontology (GO) analysis of differentially expressed, up-regulated (a) biological processes, (b) cellular components and (c) molecular functions in GCHXK, relative to the WT

**Supplementary Figure 5** Distribution of GCHY5-GFP and chlorophyll autofluorescence in the epidermis of young seedlings

**Supplementary Figure 6** HY5 and HYH expression in response to glucose

**Supplementary Table 1. qPCR Primers used in this study**

| <b>Gene</b>         | <b>Primer sequence</b>      | <b>Accession No.</b> |
|---------------------|-----------------------------|----------------------|
| <b>TUB2 f (a)</b>   | AAACTCACTACCCCCAGCTTTG      | At5g62690            |
| <b>TUB2 r</b>       | CACCAGACATAGTAGCAGAAATCAAGT |                      |
| <b>HXK1 f (a)</b>   | GCCTTTGAAGAGGATTGTGC        | At4g29130            |
| <b>HXK1 r</b>       | CATGACACGGAAGTTTGTCC        |                      |
| <b>HY5 f</b>        | TCAGAACGAGAACCAGATGC        | AT5G11260            |
| <b>HY5 r</b>        | GAAGGAGATCAAAGGCTTGC        |                      |
| <b>HY5 f</b>        | TCAGAACGAGAACCAGATGCT       | AT5G11260            |
| <b>HY5 r</b>        | CAGCATTAGAACCACCACCA        |                      |
| <b>PIF1 f</b>       | GGAGCTTTTATGGCAGAACG        | AT2G20180            |
| <b>PIF1 r</b>       | AAATCATCGTCACGGAGAGG        |                      |
| <b>PIF3 f</b>       | ACGGACCACAGTTCCAAGTC        | AT1G09530            |
| <b>PIF3 r</b>       | ATTGCCAATCGTCAAGAAC         |                      |
| <b>PIF4 f</b>       | TCCTCAAGTCATGCCTCCTC        | AT2G43010            |
| <b>PIF4 r</b>       | TAGGTCCAACGGTCGTTACC        |                      |
| <b>PIF5 f</b>       | TCAAACCCGGTACAGTTGC         | AT3G59060            |
| <b>PIF5 r</b>       | ACGGTCTGCATCTGATTTCC        |                      |
| <b>SAUR50 f (b)</b> | CACTTCCCTGTCTATGTCGGA       | AT4G34760            |
| <b>SAUR50 r</b>     | TCTTCTCGGCTCGTTGTAA         |                      |
| <b>SAUR65 f (b)</b> | AACAAAGAGCTGCCCTCAAGA       | AT1G29460            |
| <b>SAUR65 r</b>     | AAACAGCCCTTCTCCACAGC        |                      |
| <b>AtEXP8 f (c)</b> | CTCTTCCGAAGAGTACCATGT       | AT2G40610            |
| <b>AtEXP8 r</b>     | GTGTACGTCTCCTGCTCCTC        |                      |
| <b>YUC8 f (c)</b>   | CGATGAGACCAGTGGCTTGT        | AT4G28720            |
| <b>YUC8 r</b>       | TTTTCTCCCGTAGCCACCAC        |                      |
| <b>XTR7 f (c)</b>   | CGGCTTGCACAGCCTCTT          | AT4G14130            |
| <b>XTR7 r</b>       | TCGGTTGCCACTTGCAATT         |                      |
| <b>PHYB f</b>       | ACCGTCGTCAAGTCACACTC        | AT2G18790            |
| <b>PHYB r</b>       | TGATTCCGCCGGATTGTTCTGA      |                      |
| <b>COP1 f</b>       | GGTACTCGCTGCGTGATTC         | AT2G32950            |
| <b>COP1 r</b>       | GAGGAGTGTTCCAAGGCAAG        |                      |
| <b>DET1 f</b>       | TTCCACAACCACCCTACCTC        | AT4G10180            |
| <b>DET1 r</b>       | GTAGCGAAAAGACCGAAACG        |                      |

- (a) Primers adapted from Kelly *et al.* (2012)  
(b) Primers adapted from Sun *et al.* (2016 )  
(c) Primers adapted from Gangappa *et al.* (2017 )

**Supplementary Table 2. Primers used for mutant genotyping**

| <b>Gene</b>                | <b>Accession No.</b> | <b>Primer sequence</b>                                                                           | <b>Method</b> |
|----------------------------|----------------------|--------------------------------------------------------------------------------------------------|---------------|
| <b><i>pif4-101</i> (d)</b> | AT2G43010            | LP-AATACATTTTGCAGGCAATCG<br>RP-CGTAATGAAGTTGCACGTTTACTC<br>LB3-TAGCATCTGAATTTATAACCAATCTCGATACAC | PCR           |
| <b>Cop1-4 (d)</b>          | AT2G32950            | GCCACATGAGAAGAACCAGATTG<br>TGAGTAGACAAGGAGGAACAAACC                                              | Sequencing    |
| <b><i>hy5</i></b>          | AT5G11260            | LP-ATTCCTTCCCAAATGTCTCG<br>RP-ATGCGAGTGAATGACCATTTTC<br>LbaI TGGTTCACGTAGTGGGCCATCG              | PCR           |

(d) Primers adapted from Pacin *et al.* (2016)

**Supplementary Table 3. Primers used for cloning and transgenic plants identification**

| <b>Promoter/gene</b>           | <b>Primer sequence</b>                                                 |
|--------------------------------|------------------------------------------------------------------------|
| <b>GCHXK</b>                   | TCTCAACAAATTTCCCCTTGC<br>CATGACACGGAAGTTTGTCC                          |
| <b>GCHXK2 hemi/homo zygote</b> | ACCAACCACCAACTAACCTCA<br>GCTCCCTGGATAACAACGACA<br>TGCCTGCTTGCCGAATATCA |
| <b>35SHXK</b>                  | CAACCACGTCTTCAAAGCAA<br>CATGACACGGAAGTTTGTCC                           |
| <b>35SFRK1</b>                 | CAACCACGTCTTCAAAGCAA<br>AACATACGGCCGAACATC                             |
| <b>35SFRK2</b>                 | CAACCACGTCTTCAAAGCAA<br>ACGATGTTTCTATGCTCCTCCCT                        |
| <b>GCHY5</b>                   | TCTCAACAAATTTCCCCTTGC<br>ACCACCTCCTCTTGTGTTCC                          |
| <b>35SHY5</b>                  | CAACCACGTCTTCAAAGCAA<br>ACCACCTCCTCTTGTGTTCC                           |
| <b>GCPIF4</b>                  | TCTCAACAAATTTCCCCTTGC<br>ACCGGGATTGTTCTGAATTG                          |
| <b>GCHY5-GFP</b>               | TCTCAACAAATTTCCCCTTGC<br>ACCACCTCCTCTTGTGTTCC<br>ACTGGGTGCTCAGGTAGTGG  |

**Supplementary Table 4. Accession numbers and probe ID numbers of *AtHY5*, *AtHYH* used in the microarray database analysis**

| <b>Gene name</b>    | <b>Accession</b> | <b>Probe set ID</b> |
|---------------------|------------------|---------------------|
| <b><i>AtHY5</i></b> | AT5G11260        | 250420_AT           |
| <b><i>AtHYH</i></b> | AT3G1769         | 258349_AT           |

**Supplementary Table 5. Optimized LC-MS-MS parameters for quantification of plants hormone.**

| <b>Analite and IS</b> | <b>Retention time (min)</b> | <b>Ionization mode</b> | <b>MRM transition (m/z)</b> | <b>Dwell time (msec)</b> | <b>Cone (V)</b> | <b>Collision (V)</b> |
|-----------------------|-----------------------------|------------------------|-----------------------------|--------------------------|-----------------|----------------------|
| IAA                   | 7.50                        | +                      | 176>130                     | 70                       | 18              | 26                   |
|                       |                             |                        | 176>103                     |                          |                 | 28                   |
| D5-IAA                | 7.42                        | +                      | 181>134                     | 70                       | 20              | 16                   |
|                       |                             |                        | 181>106                     |                          |                 | 30                   |
| IAAsp                 | 5.50                        | +                      | 291>134                     | 100                      | 20              | 12                   |
|                       |                             |                        | 291>130                     |                          |                 | 20                   |
| DN-IAAsp              | 5.40                        | +                      | 297>136                     | 100                      | 20              | 12                   |
|                       |                             |                        | 297>134                     |                          |                 | 22                   |
| IAGlu                 | 5.77                        | +                      | 305>148                     | 100                      | 22              | 12                   |
|                       |                             |                        | 305>130                     |                          |                 | 16                   |
| DN-IAGlu              | 5.81                        | +                      | 311>150                     | 100                      | 20              | 12                   |
|                       |                             |                        | 311>134                     |                          |                 | 20                   |
| OxIAA                 | 5.18                        | +                      | 192>146                     | 50                       | 14              | 14                   |
|                       |                             |                        | 192>128                     |                          |                 | 24                   |

**Supplementary Table 6. Solvent gradient program for auxins**

| <b>Time (min)</b> | <b>Phase A %</b> | <b>Phase B %</b> |
|-------------------|------------------|------------------|
| <b>Initial</b>    | 95               | 5                |
| <b>0.5</b>        | 95               | 5                |
| <b>14</b>         | 50               | 50               |
| <b>15</b>         | 5                | 95               |
| <b>18</b>         | 5                | 95               |
| <b>19</b>         | 95               | 5                |
| <b>22</b>         | 95               | 5                |

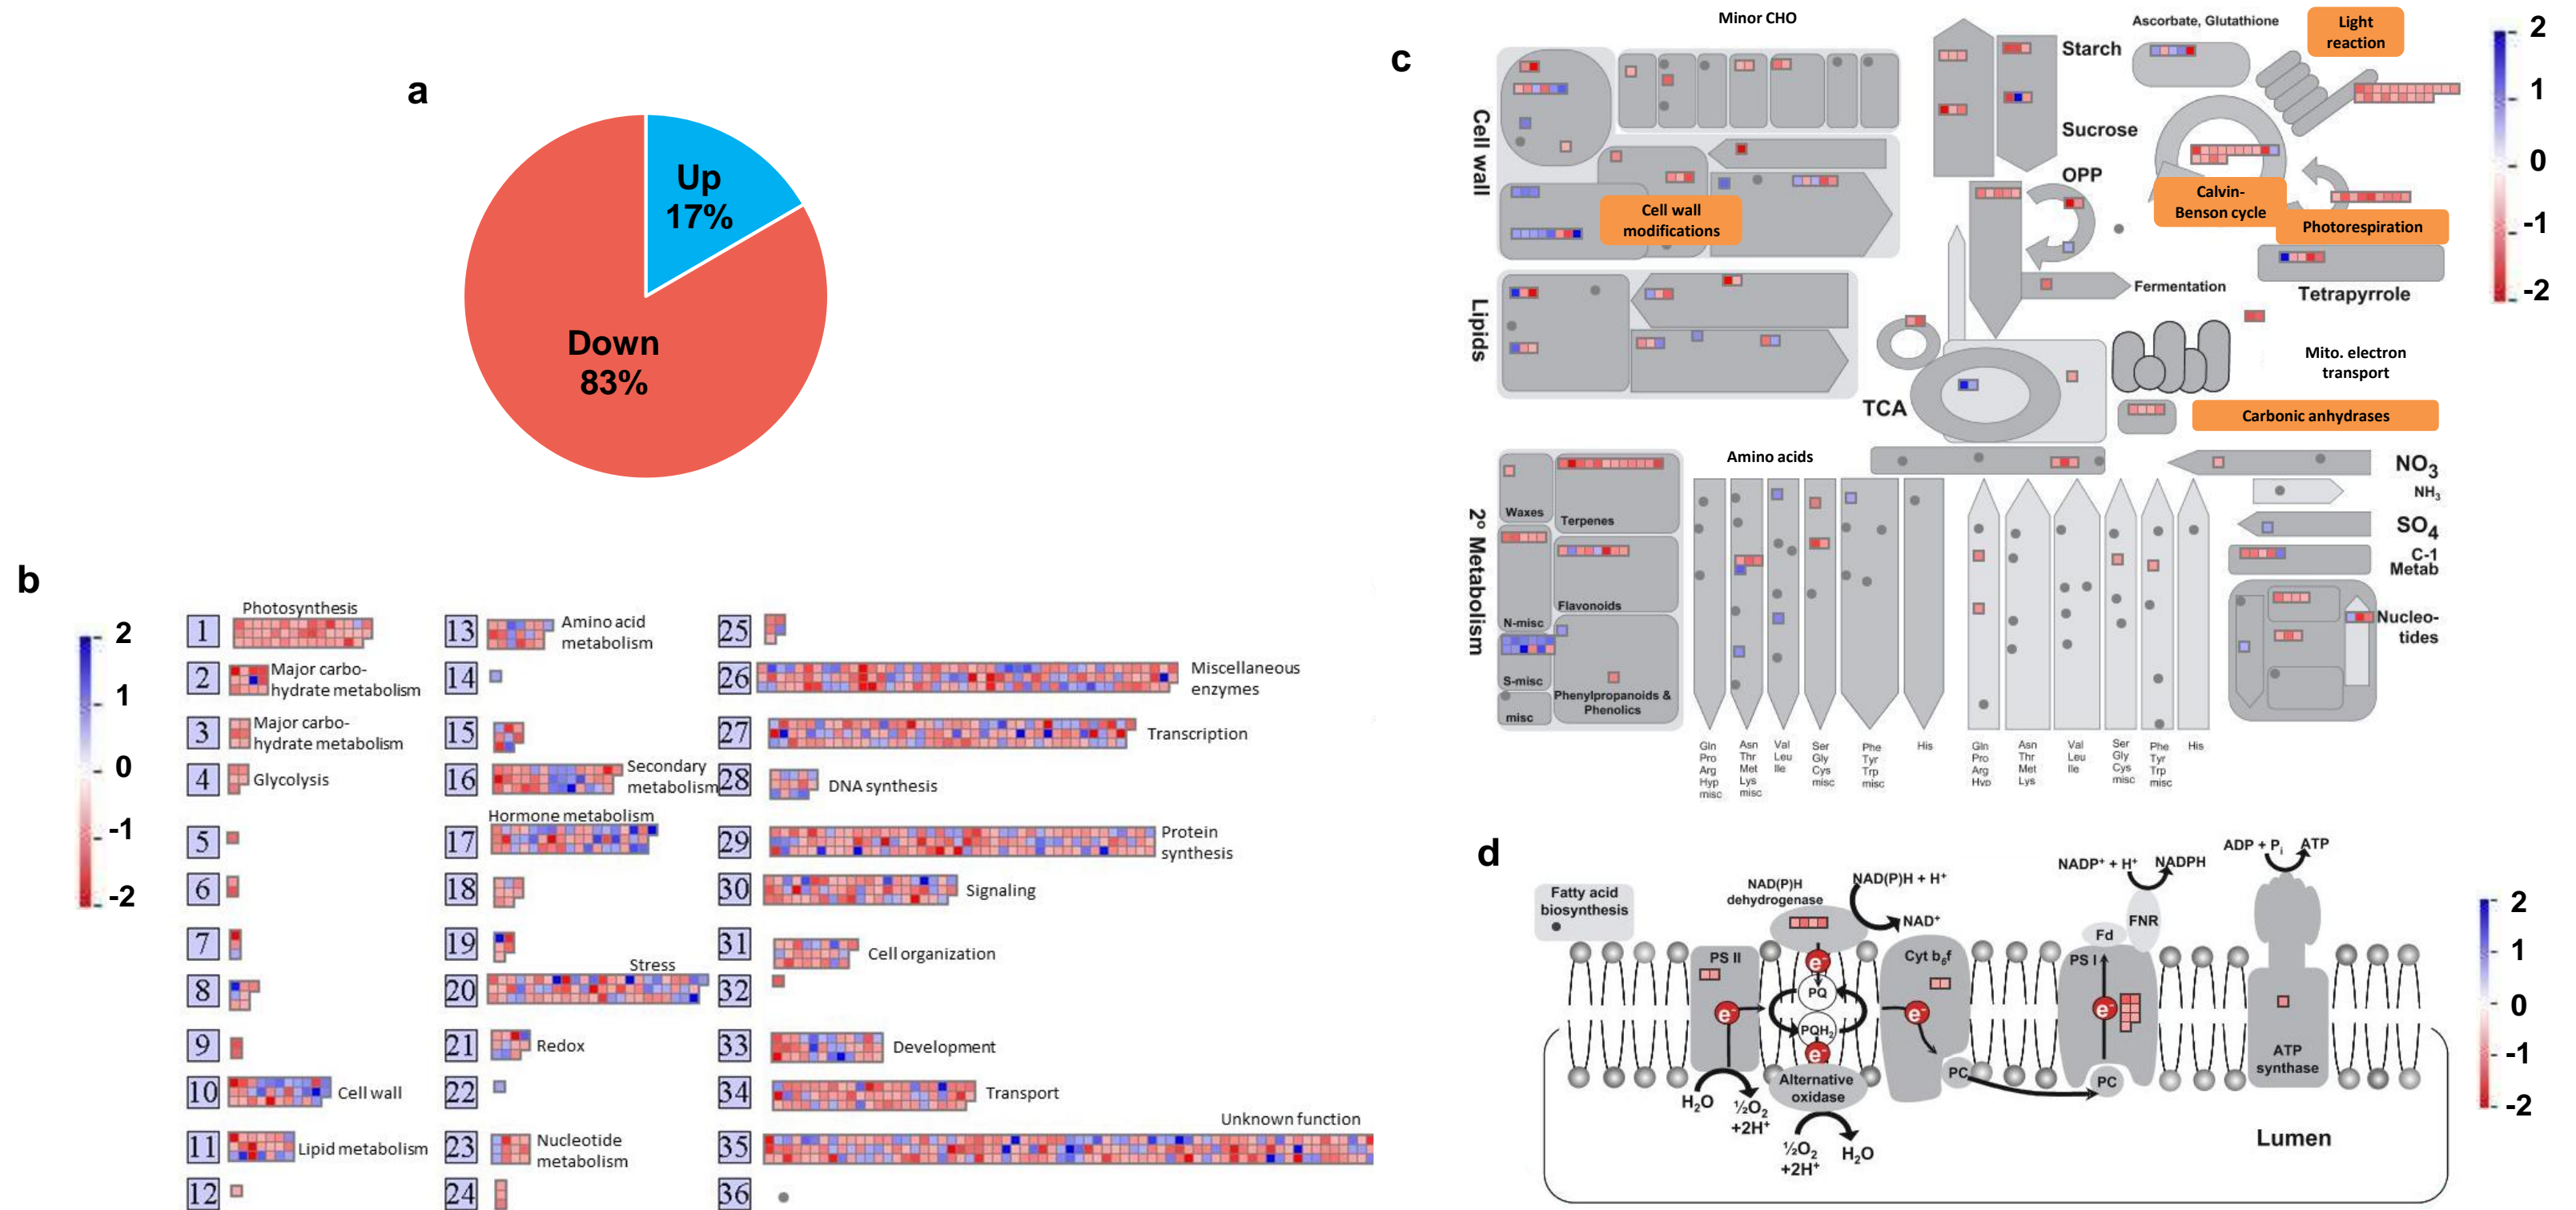

**Supplementary Figure 1 Genes differentially expressed in GCHXK transgenic seedlings relative to the WT.** Transcriptome analysis of 4-day-old GCHXK and WT seedlings. **a** The total number of transcripts that were up-regulated (blue) and down-regulated (red) in GCHXK relative to WT. **b** MapMan functional overview of transcript level changes in GCHXK seedlings relative to the WT. Genes are grouped into functional categories. **c** MapMan metabolism overview showing transcript level changes in GCHXK seedlings relative to WT. Light reactions, Calvin cycle, carbonic anhydrases and cell-wall groups are highlighted in orange. **d** GCHXK-regulated genes in the photosynthetic light reaction, as visualized by MapMan. **b-d** Genes up-regulated by GCHXK are stained blue and genes down-regulated by GCHXK are stained red.

## Changed pathways

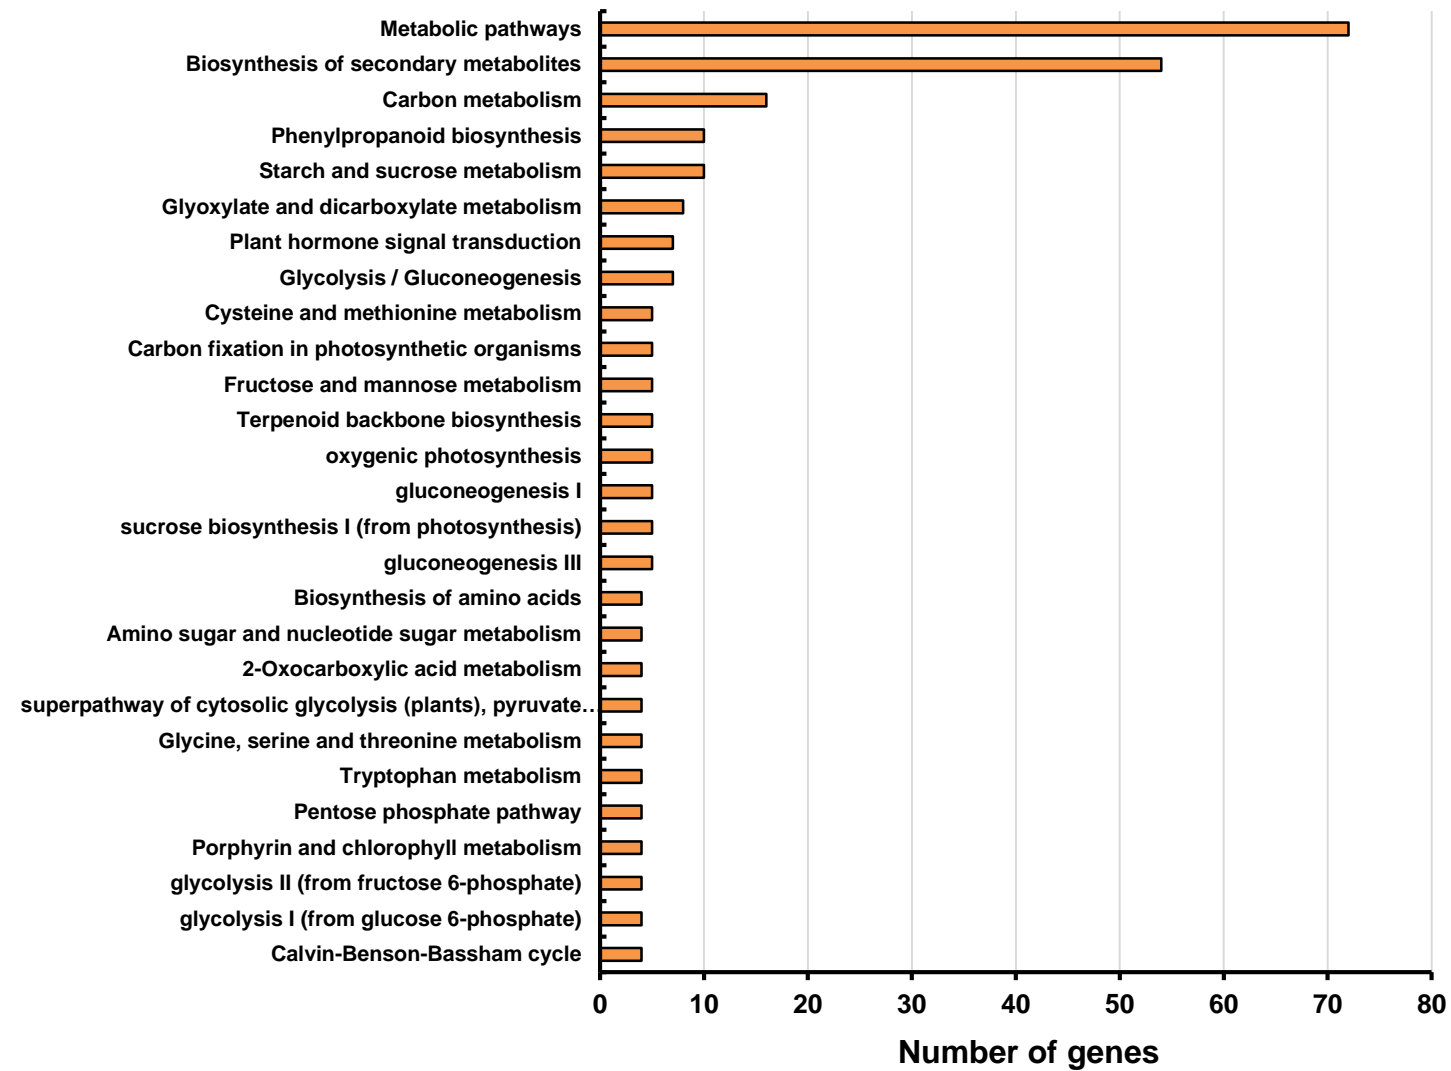

**Supplementary Figure 2 Pathways changed by GCHXK.** Pathways changed in GCHXK, relative to the WT, displayed by the number of genes significantly changed for each pathway. Changed pathways were analyzed by enrichment analysis using KOBAS (based on the KEGG PATHWAY and BioCyc databases). Pathways with more than three changed genes are displayed.

## Down-regulation

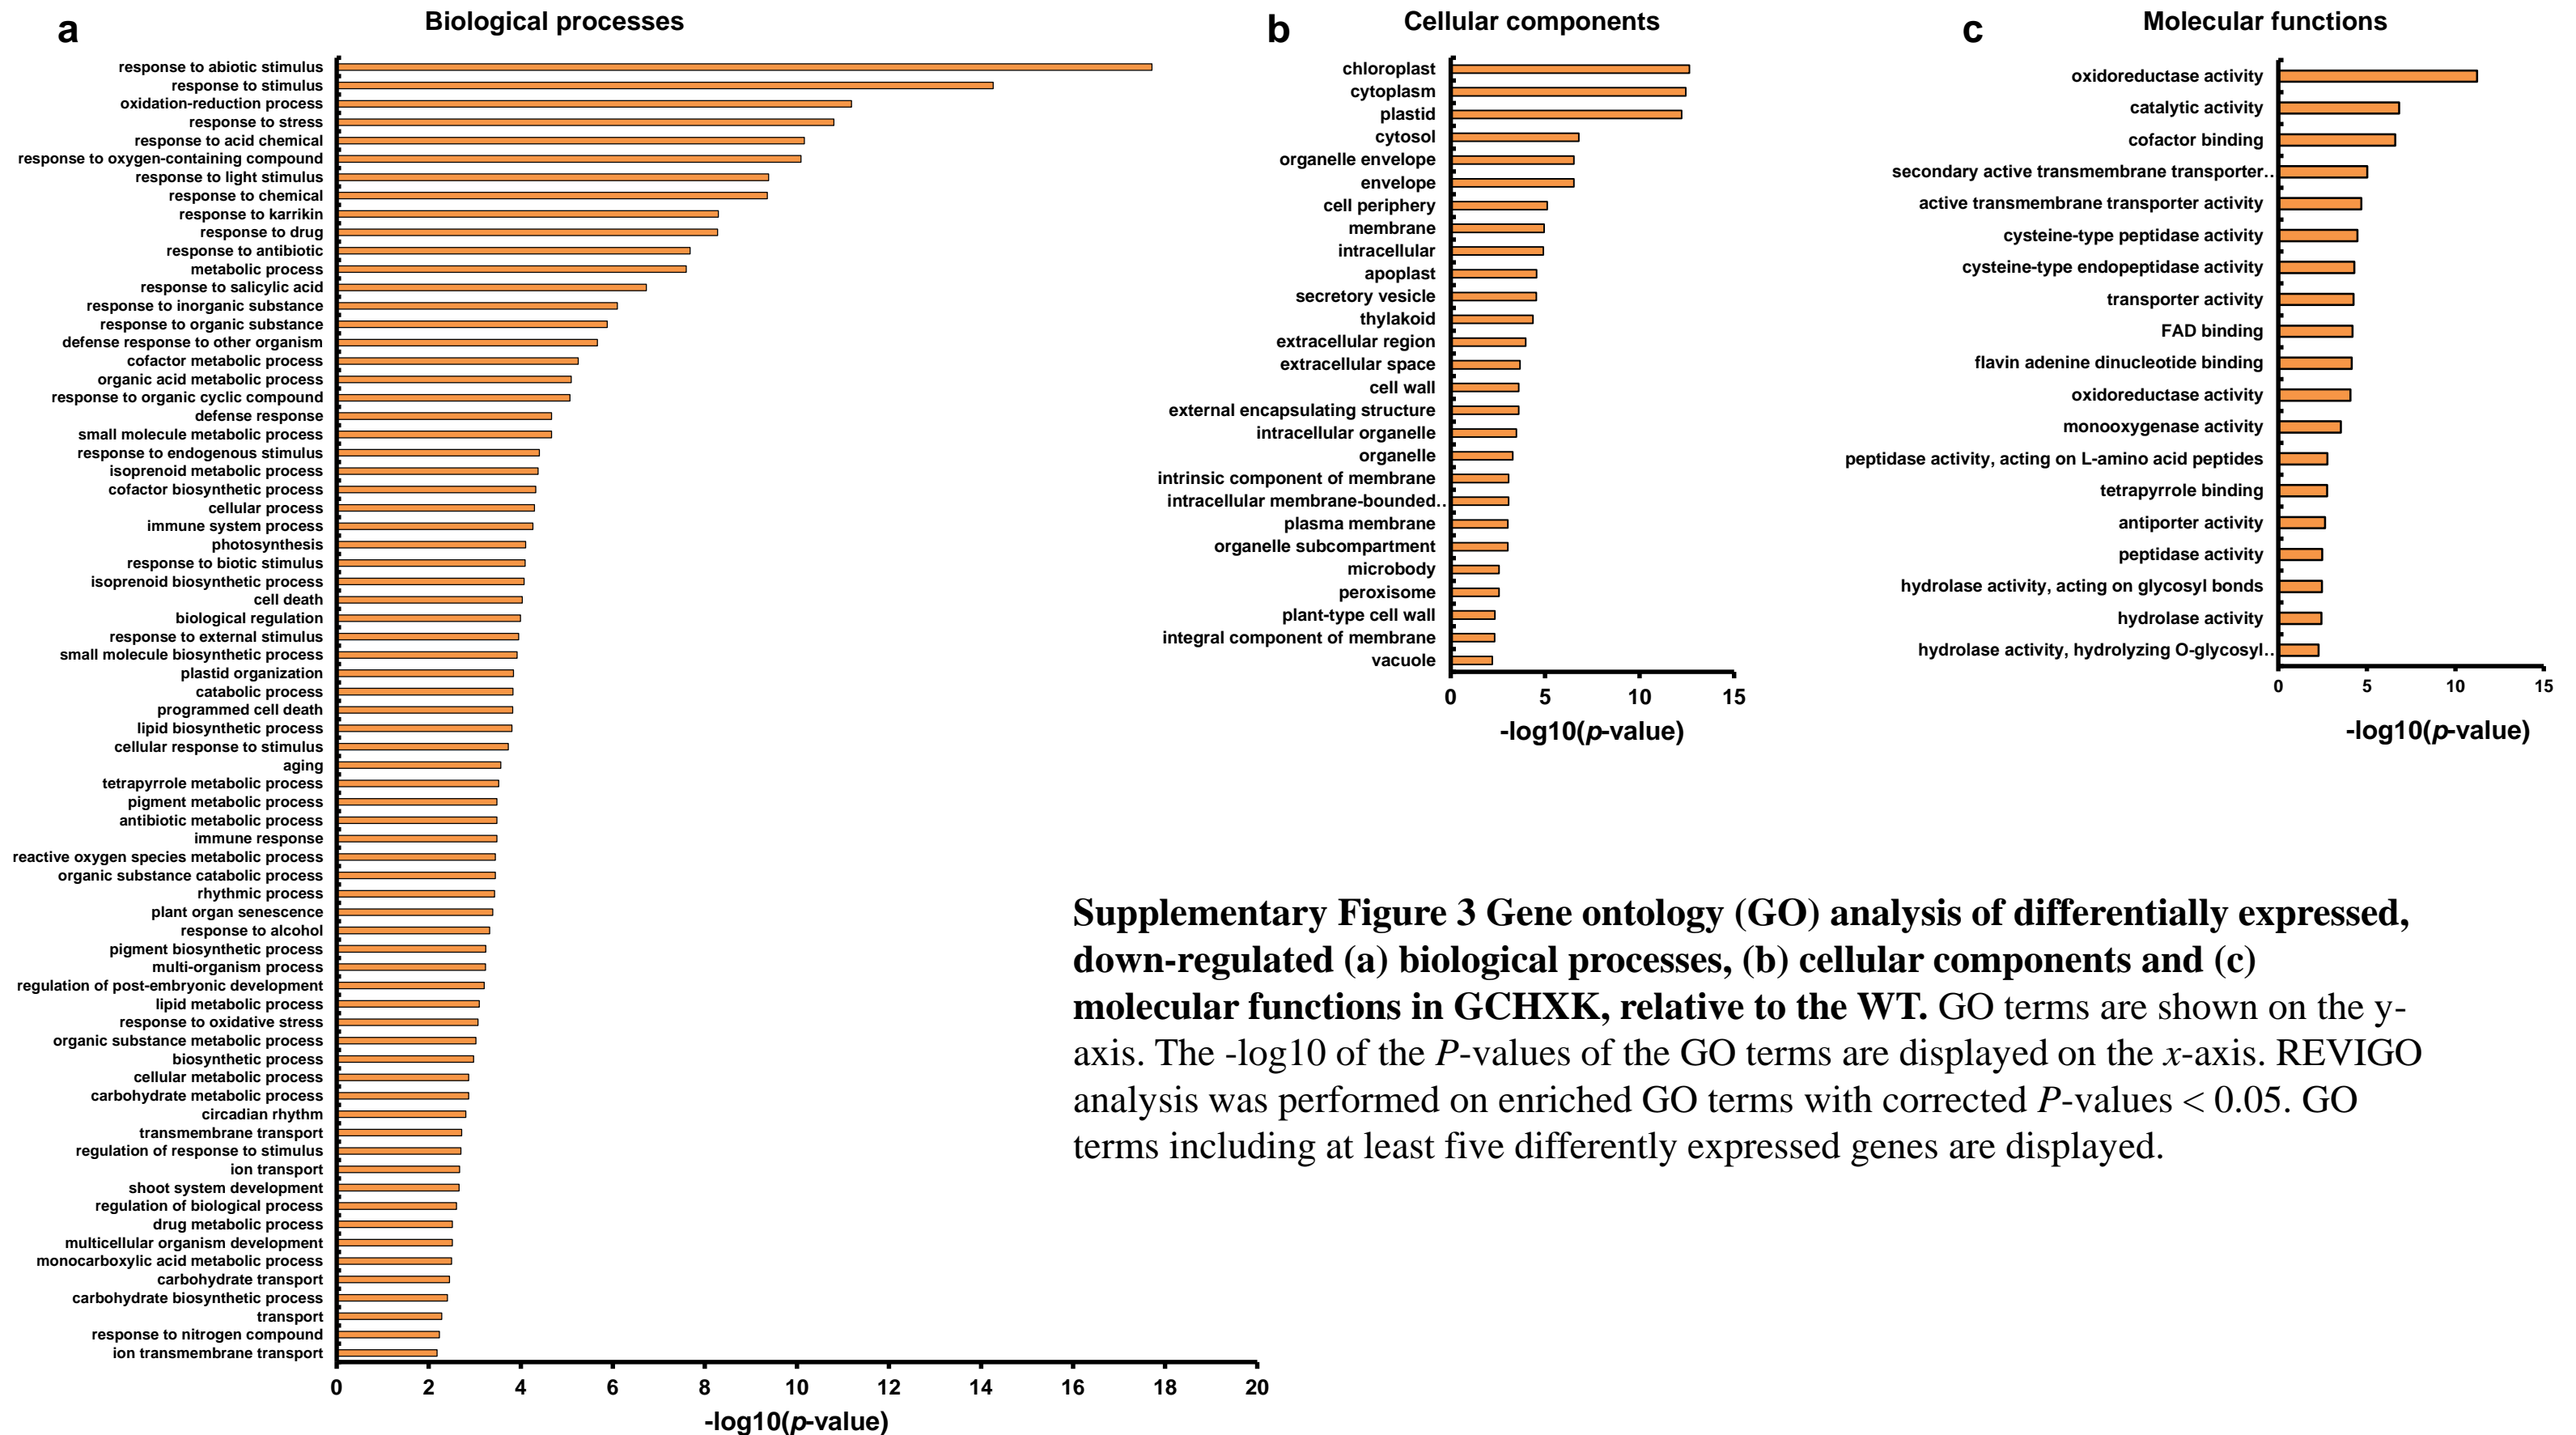

**Supplementary Figure 3 Gene ontology (GO) analysis of differentially expressed, down-regulated (a) biological processes, (b) cellular components and (c) molecular functions in GCHXK, relative to the WT. GO terms are shown on the y-axis. The  $-\log_{10}$  of the  $P$ -values of the GO terms are displayed on the  $x$ -axis. REVIGO analysis was performed on enriched GO terms with corrected  $P$ -values  $< 0.05$ . GO terms including at least five differently expressed genes are displayed.**



# Up-regulation

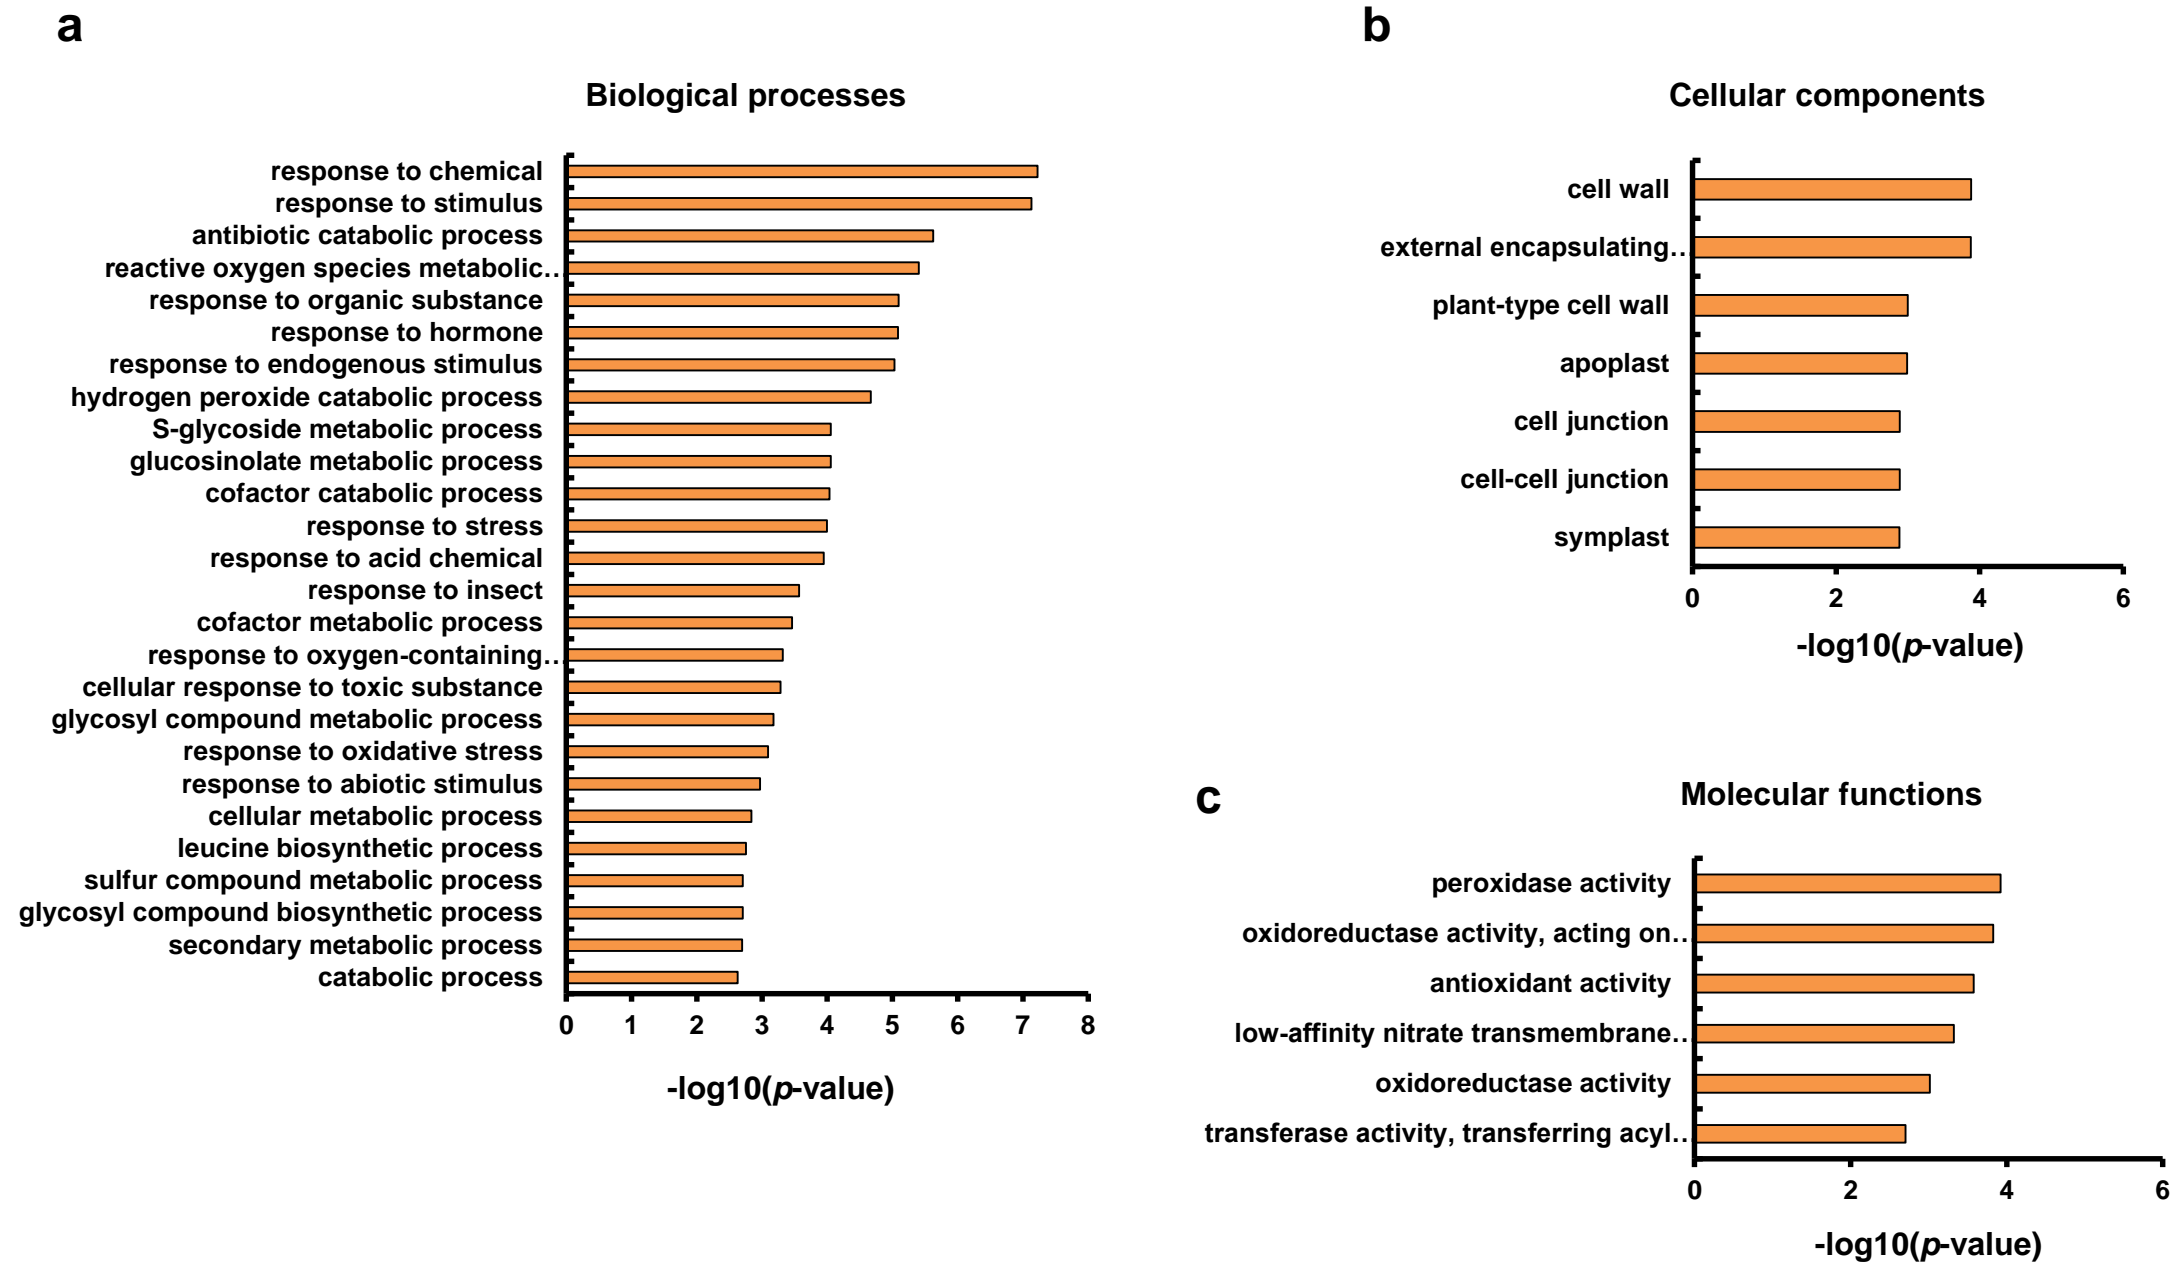

**Supplementary Figure 4 Gene ontology (GO) analysis of differentially expressed, up-regulated (a) biological processes, (b) cellular components and (c) molecular functions in GCHXK, relative to the WT. GO terms are shown on the y-axis. The  $-\log_{10}$  of the  $P$ -values of the GO terms are displayed on the x-axis. REVIGO analysis was performed on enriched GO terms with corrected  $P$ -values  $< 0.05$ .**

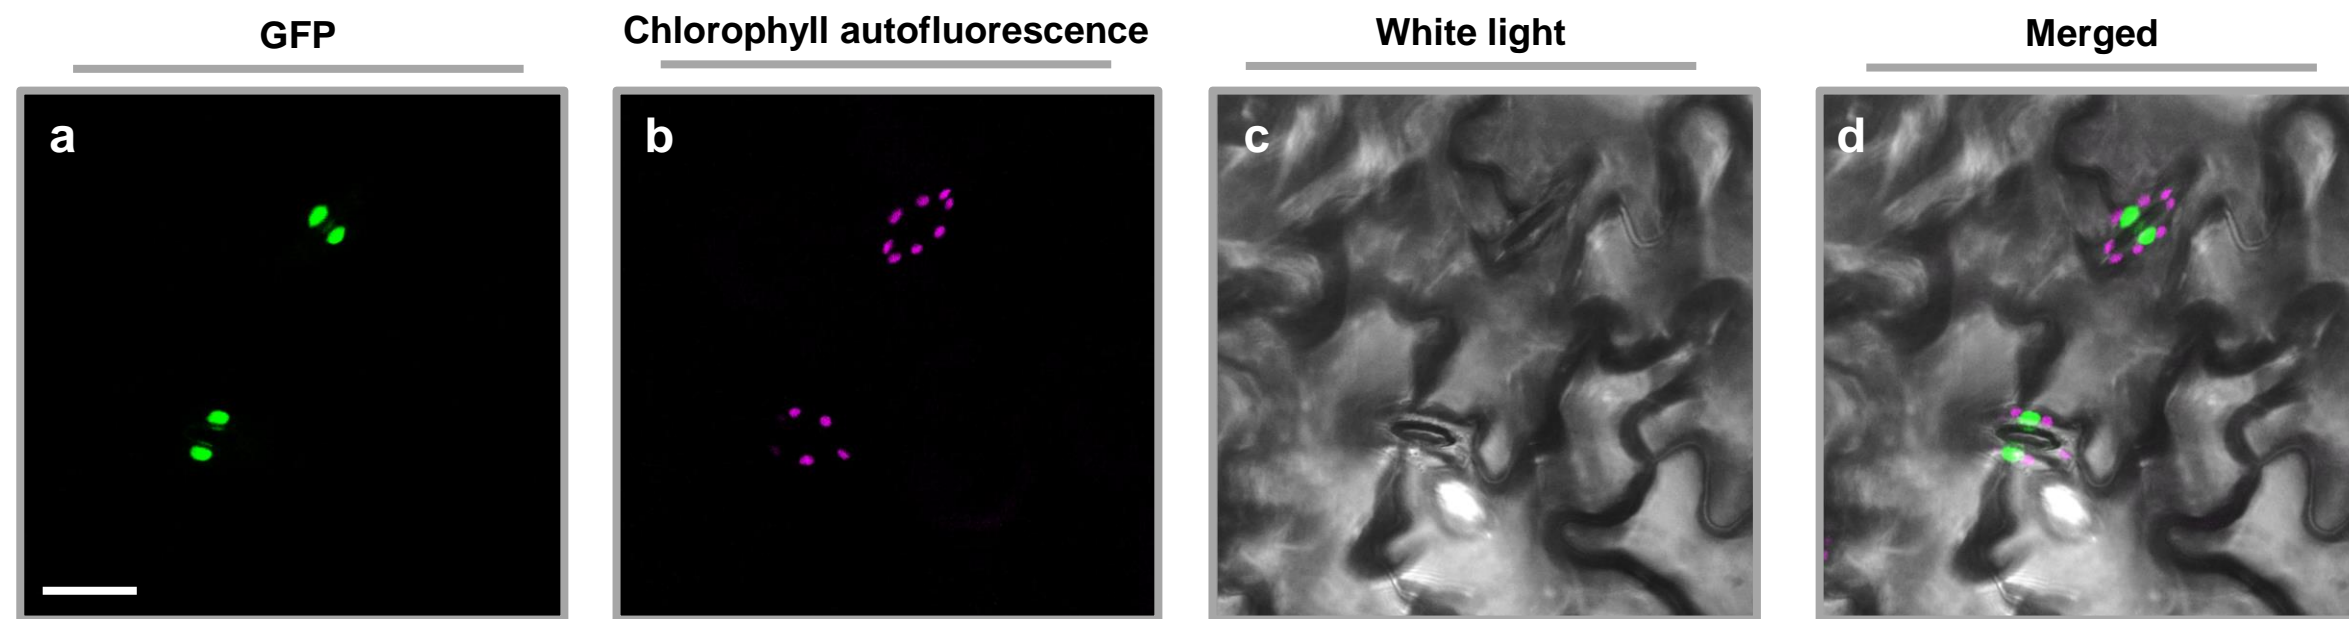

**Supplementary Figure 5 Distribution of GCHY5-GFP and chlorophyll autofluorescence in the epidermis of young seedlings.** Representative confocal images of GCHY5-GFP epidermis taken from the cotyledon of a 7-day-old seedling. **a** GFP fluorescence (stained green). **b** Chlorophyll autofluorescence (stained magenta). **c** White light. **d** Merged image of (a-c). Bar = 20  $\mu$ M.

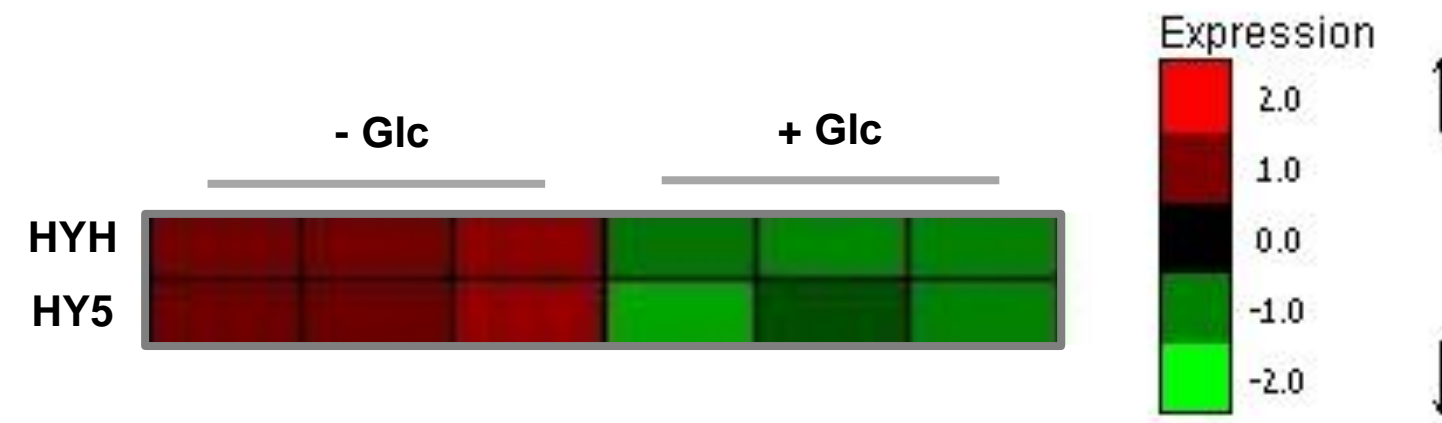

**Supplementary Figure 6 HY5 and HYH expression in response to glucose.** Data were obtained from the NASCArrays microarray database, Experiment No. 593, in which 7-day-old seedlings were exposed to 3% glucose for 6 h, followed by microarray analysis. The colors red and green represent induced or reduced expression, respectively, and the intensity of the color indicates the strength of expression. The accession number and the Affimetrix probe ID number for each gene are listed in Table S4.
