# Supplementary material for: Guard cells control hypocotyl elongation through HXK1, HY5, and PIF4
Source: PubMed Central journal article supplement (PMC8217561; doi:10.1038/s42003-021-02283-y), 2021-06-21
Supplement: 42003_2021_2283_MOESM3_ESM.pdf [file 42003_2021_2283_MOESM3_ESM.pdf]

## **Description of Additional Supplementary Files**

File Name: Supplementary Data 1

Description: Transcriptome analysis of 4-day-old WT and GCHXK seedlings.

File Name: Supplementary Data 2

Description: Gene ontology analysis of differentially expressed biological processes, cellular components and molecular functions in GCHXK, relative to the WT.
